# Supplementary material for: An infrared and inelastic neutron scattering spectroscopic investigation on the interaction of η-alumina and methanol
Source: Royal Society of Chemistry journal article supplement (doi:10.1039/b505974g), 2005-01-01
Supplement: b505974g.pdf [file b505974g.pdf]

## Supplementary Information.

S1

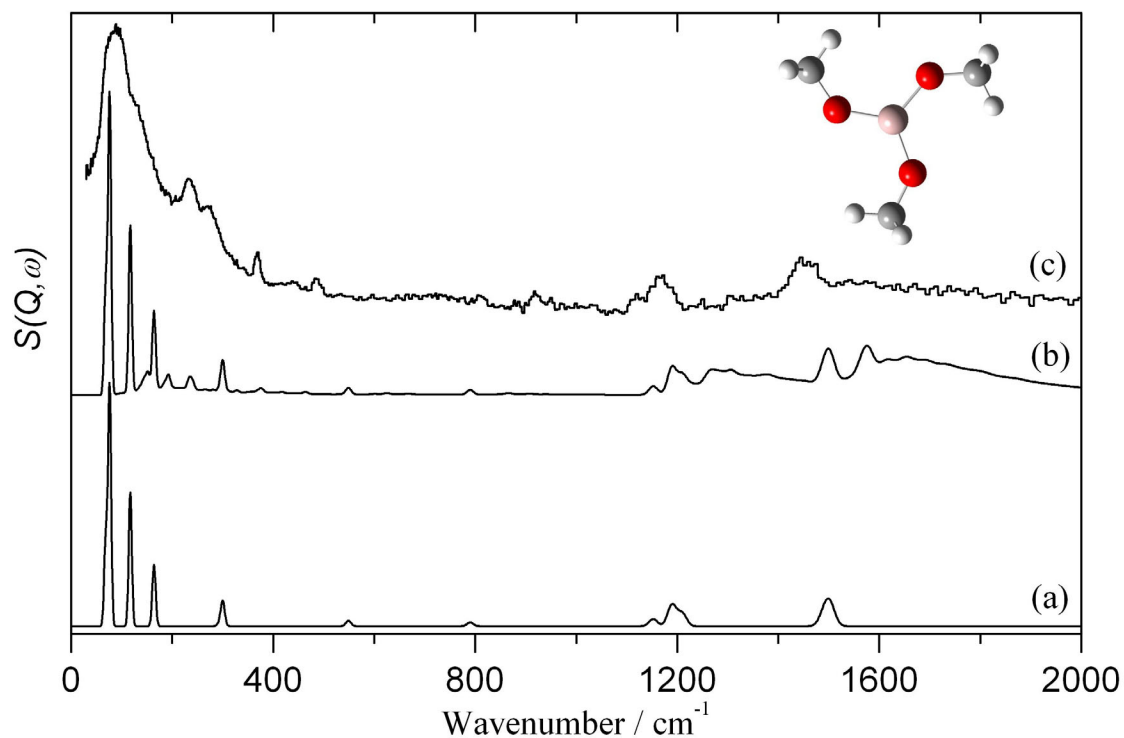

**Figure S1.** Comparison of the inelastic neutron scattering spectrum of  $\text{Al}(\text{OCH}_3)_3$  with that calculated by DFT (B3LYP/6-31++g(2d,2p)). (a) Calculated spectrum, fundamentals only, (b) calculated spectrum including phonon wings, combinations and overtones (up to  $n = 10$ ), (c) experimental spectrum. The planar  $C_{3h}$  structure used for the DFT calculation is shown at the top right.

**Table S1.** Comparison of calculated (B3LYP/6-31++g(2d,2p)) and observed INS frequencies for  $\text{Al}(\text{OCH}_3)_3$ .

| Calc. / $\text{cm}^{-1}$ | Expt. / $\text{cm}^{-1}$ | Assignment                          |
|--------------------------|--------------------------|-------------------------------------|
| 68                       |                          | AlO-CH <sub>3</sub> oop bend A''    |
| 74                       | 88 vs,br                 | CH <sub>3</sub> torsion E''         |
| 76                       |                          | CH <sub>3</sub> torsion A''         |
| 77                       |                          | AlO-CH <sub>3</sub> ip bend E'      |
| 117                      | 232 s                    | Al-O oop bend E''                   |
| 164                      | 273 s                    | Al-O-C ip bend A'                   |
| 293                      | 368 m                    | Al-O oop bend A''                   |
| 301                      |                          | Al-O-C ip bend E'                   |
| 550                      | 487 w                    | Al-O sym stretch A'                 |
| <sup>s2</sup> 791        | 808 w                    | Al-O asym stretch E'                |
| 1153                     | 1117 m                   | AlO-CH <sub>3</sub> asym stretch E' |
| 1154                     |                          | AlO-CH <sub>3</sub> sym stretch A'  |
| 1190                     | 1167 s                   | CH <sub>3</sub> rock E''            |
| 1190                     |                          | CH <sub>3</sub> rock A''            |
| 1206                     |                          | CH <sub>3</sub> rock E'             |
| 1211                     |                          | CH <sub>3</sub> rock A'             |
| 1491                     |                          | C-H sym bend A'                     |
| 1491                     | 1444 s                   | C-H sym bend E'                     |
| 1500                     |                          | C-H asym bend A''                   |
| 1501                     |                          | C-H asym bend E''                   |
| 1504                     |                          | C-H asym bend A'                    |
| 1505                     | 1468 s                   | C-H asym bend E'                    |
| 3000                     |                          | C-H sym stretch E'                  |
| 3002                     |                          | C-H sym stretch A'                  |
| 3065                     |                          | C-H asym stretch A'                 |
| 3065                     |                          | C-H asym stretch E'                 |
| 3066                     |                          | C-H asym stretch E''                |
| 3066                     |                          | C-H asym stretch A''                |

s = strong, m = medium, w = weak, br = broad, v = very, oop = out-of-plane, ip = in-plane, sym = symmetric, asym = antisymmetric.

Note: The calculations were carried out assuming an isolated molecule of  $C_{3h}$  symmetry. The solid state structure of  $\text{Al}(\text{OCH}_3)_3$  is not known although it is speculated (Amma E.L. *J. Inorg. Nucl. Chem.* **1963**, 25, 779) that it is oligomeric or polymeric. If the speculation is correct, this would account for the differences observed in the low energy region.

**Table S2.** Comparison of experimental results for methoxy on  $\eta$ -alumina and calculated frequencies for methoxy on  $\eta$ -Al<sub>2</sub>O<sub>3</sub>(110).

| Experimental / cm <sup>-1</sup> |             | Calculated / cm <sup>-1</sup>                                                                                                                                                                              | Assignment                                       |
|---------------------------------|-------------|------------------------------------------------------------------------------------------------------------------------------------------------------------------------------------------------------------|--------------------------------------------------|
| INS                             | Infrared    |                                                                                                                                                                                                            |                                                  |
|                                 |             | 17, 88                                                                                                                                                                                                     | Al–O–Al bend                                     |
|                                 |             | 104                                                                                                                                                                                                        | Al–O–CH <sub>3</sub> bend                        |
| 140s                            |             | <sup>s3</sup> 141                                                                                                                                                                                          | Al–O–CH <sub>3</sub> bend                        |
| 96vs                            |             | 151                                                                                                                                                                                                        | CH <sub>3</sub> torsion                          |
| 197s                            |             |                                                                                                                                                                                                            | (2 × CH <sub>3</sub> torsion)                    |
| 280s                            |             |                                                                                                                                                                                                            | (2 × Al–O–CH <sub>3</sub> bend)                  |
|                                 |             | 198,220, 235, 244, 253,<br>261,266, 286, 312, 329,<br>336, 355, 380, 386, 400,<br>404, 410, 427, 448, 466,<br>475, 482, 538, 563, 569,<br>573, 591, 598, 611, 617,<br>655, 669, 678, 691, 706,<br>715, 787 | Alumina lattice                                  |
| 936w                            |             | 843                                                                                                                                                                                                        | O–CH <sub>3</sub> stretch                        |
| 1169m                           |             | 1036, 1060                                                                                                                                                                                                 | CH <sub>3</sub> rock                             |
| 1265w                           |             |                                                                                                                                                                                                            | (CH <sub>3</sub> torsion + CH <sub>3</sub> rock) |
|                                 | 1452sh      | 1262                                                                                                                                                                                                       | Symmetric CH <sub>3</sub> bend                   |
| 1463m                           | 1480s       | 1314, 1367                                                                                                                                                                                                 | Antisymmetric CH <sub>3</sub> bend               |
| 2385vw                          |             |                                                                                                                                                                                                            | (2 × CH <sub>3</sub> rock)                       |
| 2622w                           | 2507,2607mw |                                                                                                                                                                                                            | (CH <sub>3</sub> rock + CH <sub>3</sub> bend)    |
|                                 | 2820s       | 2840                                                                                                                                                                                                       | Symmetric C–H stretch                            |
| 2983s,br                        | 2938s       |                                                                                                                                                                                                            | Antisymmetric C–H stretch                        |
|                                 |             | 2922, 2997                                                                                                                                                                                                 |                                                  |

s = strong, m = medium, w = weak, br = broad, sh = shoulder, v = very

Full author list for reference 37.

- 37 Frisch, M. J.; Trucks, G. W.; Schlegel, H. B.; Scuseria, G. E.; Robb, M. A.; Cheeseman, V. G.; Montgomery, J. A. Jr.; Vreven, T.; Kudin, K.N.; Burant, J. C.; Millam, J. M.; Iyengar, S.S.; Tomasi, J.; Barone, V.; Mennucci, B.; Cossi, M.; Scalmani, G.; Rega, N.; Petersson, G. A.; Nakatsuji, H.; Hada, M.; Ehara, M.; Toyota, K.; Fukuda, R.; Hasegawa, J.; Ishida, M.; Nakajima, T.; Honda, Y.; Kitao, O.; Nakai, H.; Klene, M.; Li, X.; Knox, J.E.; Hratchian, H.P.; Cross, J.B.; Adamo, C.; Jaramillo, J.; Gomperts, R.; Stratmann, R.E.; Yazyev, O.; Austin, A.J.; Cammi, R.; Pomelli, C.; Ochterski, J.W.; Ayala, P.Y.; Morokuma, K.; Voth, G.A.; Salvador, P.; Dannenberg, J.J.; Zakrzewski, V.G.; Dapprich, S.; Daniels, A.D.; Strain, M.C.; Farkas, O.; Malick, D.K.; Rabuck, A.D.; Raghavachari, K.; Foresman, J.B.; Ortiz, J.V.; Cui, Q.; Baboul, A.G.; Clifford, S.; Cioslowski, J.; Stefanov, B.B.; Liu, G.; Liashenko, A.; Piskorz, P.; Komaromi, I.; Martin, R.L.; Fox, D.J.; Keith, T.; Al-Laham, M.A.; Peng, C.Y.; Nanayakkara, A.; Challacombe, M.; Gill, P.M.W.; Johnson, B.; Chen, W.; Wong, M.W.; Gonzalez, C.; Pople, J. A. *Gaussian03*, revision B.05; Gaussian, Inc.: Pittsburgh, PA, 2003.
